# Supplementary material for: Covalent triazine framework supported non-noble metal nanoparticles with superior activity for catalytic hydrolysis of ammonia borane: from mechanistic study to catalyst design
Source: PubMed Central journal article supplement (PMC5299936; doi:10.1039/c6sc02456d), 2016-08-30
Supplement: SC-008-C6SC02456D-s001.pdf [file SC-008-C6SC02456D-s001.pdf]

Supplementary information of  
Covalent triazine framework supported non-noble metal  
nanoparticles with superior activity for catalytic hydrolysis of  
ammonia borane: from mechanistic study to catalyst design

Zhao Li<sup>a,b</sup>, Teng He<sup>\*,a</sup>, Lin Liu<sup>a</sup>, Weidong Chen<sup>a,b</sup>, Miao Zhang<sup>a,b</sup>, Guotao Wu<sup>a</sup>, Ping  
Chen<sup>a,c</sup>

*<sup>a</sup>Dalian National Laboratory for Clean Energy, Dalian Institute of Chemical Physics,  
Chinese Academy of Sciences, Dalian, 116023, China*

*<sup>b</sup>University of the Chinese Academy of Sciences, Beijing 100049, China*

*<sup>c</sup>State Key Laboratory of Catalysis and Collaborative Innovation Center of Chemistry  
for Energy Materials, Dalian Institute of Chemical Physics, Chinese Academy of  
Sciences, Dalian, 116023, China*

**Corresponding Author**

E-mail address: [heteng@dicp.ac.cn](mailto:heteng@dicp.ac.cn)

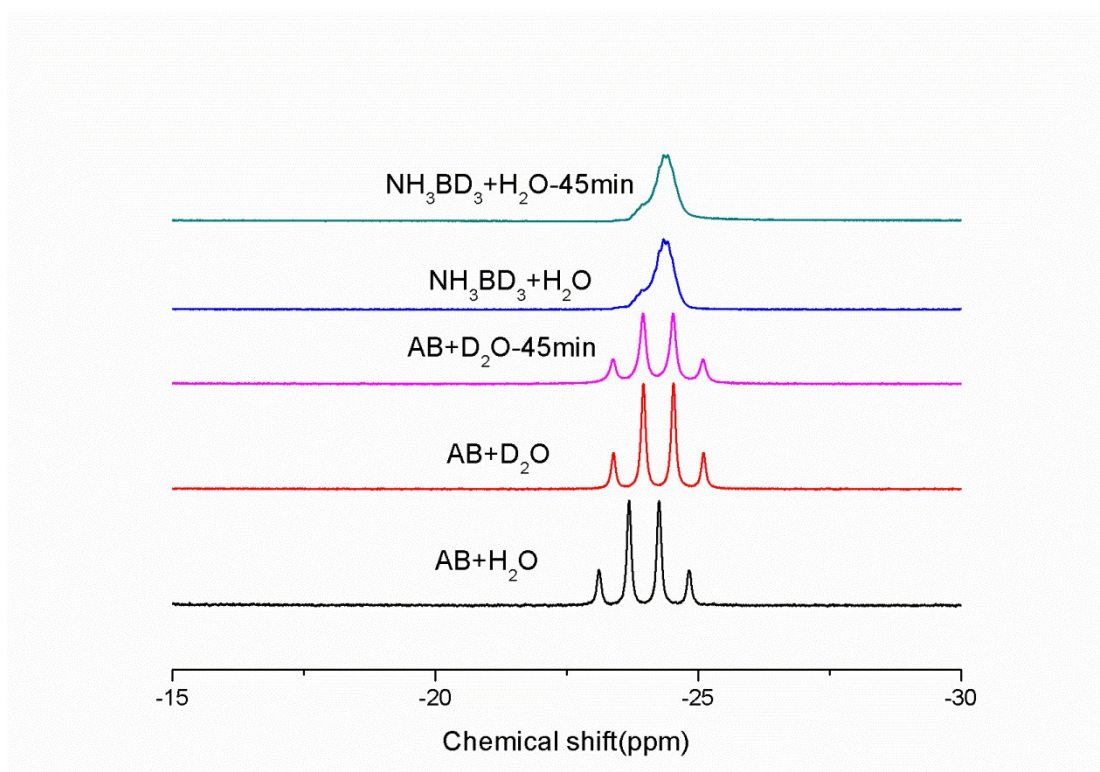

**Figure S1.**  $^{11}\text{B}$  NMR spectra of the AB and  $\text{NH}_3\text{BD}_3$  dissolving in  $\text{D}_2\text{O}$  and  $\text{H}_2\text{O}$  measured at different time.

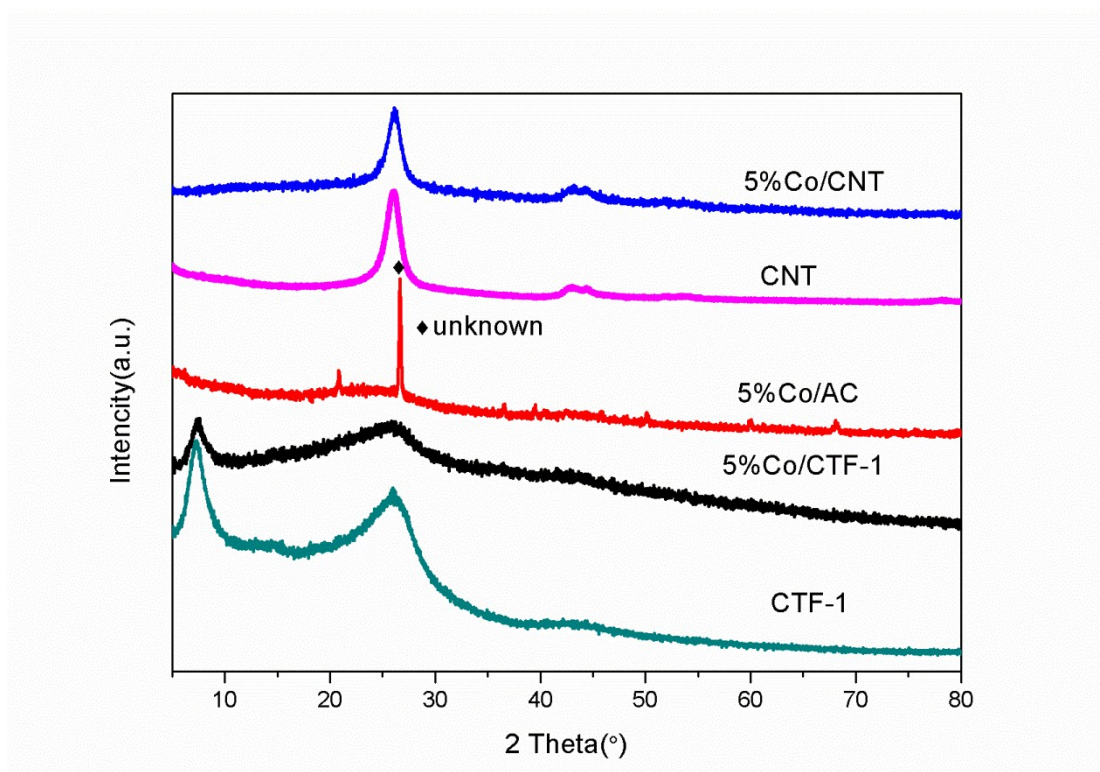

**Figure S2.** XRD patterns of CTF-1, CNT, 5%Co/CTF-1, 5%Co/CNT, 5%Co/AC.

**Table S1. The surface areas before and after loading ( $S_{BET}$ ), Co contents determined by ICP, and average particle sizes of CTF-1, CNT and AC supported catalysts.**

| <b>Catalysts and supports</b> | <b>Co contents (wt%)</b> | <b>Average particle size(nm)</b> | <b><math>S_{BET}</math> Before loading(m<sup>2</sup>/g)</b> | <b><math>S_{BET}</math> After loading(m<sup>2</sup>/g)</b> |
|-------------------------------|--------------------------|----------------------------------|-------------------------------------------------------------|------------------------------------------------------------|
| <b>5%Co/CTF-1</b>             | <b>4.48</b>              | <b>3.3</b>                       | <b>947</b>                                                  | <b>726</b>                                                 |
| <b>5%Co/CNT</b>               | <b>4.24</b>              | <b>7.3</b>                       | <b>160</b>                                                  | <b>156</b>                                                 |
| <b>5%Co/AC</b>                | <b>4.34</b>              | <b>-</b>                         | <b>714</b>                                                  | <b>685</b>                                                 |
| <b>3%Co/CTF-1</b>             | <b>2.83</b>              | <b>-</b>                         | <b>-</b>                                                    | <b>-</b>                                                   |

**Table S2. Selective activities in terms of TOF values ( $\text{mol H}_2 \cdot (\text{mol catalyst})^{-1} \cdot \text{min}^{-1}$ ) and activation energy  $E_a$  (kJ/mol) of the non-noble metal catalysts tested in hydrogen generation from the hydrolysis of AB so far.**

| Catalyst                                            | $n_{\text{metal}}/n_{\text{AB}}$ | TOF   | $E_a$ (kJ/mol) | Reference  |
|-----------------------------------------------------|----------------------------------|-------|----------------|------------|
| 10wt% Co/ $\gamma$ -Al <sub>2</sub> O <sub>3</sub>  | 0.018                            | 2.30  | 62             | 1          |
| 10 wt %Co/SiO <sub>2</sub>                          | 0.018                            | 2.3   | -              | 1          |
| 10 wt % Co/C                                        | 0.018                            | 2.92  | -              | 1          |
| Co/zeolite                                          | 0.02                             | 5.36  | 56             | 2          |
| PVP-Co                                              | 0.025                            | 4.80  | 46             | 3          |
| PSMA-Co                                             | 0.001                            | 25.7  | 34.22          | 4          |
| Co/graphene                                         | 0.05                             | 13.8  | 32.75          | 5          |
| G6-OH(Co <sub>60</sub> )                            | 0.013                            | 10    | 50.2           | 6          |
| Ni/C                                                | 0.0425                           | 8.8   | 28             | 7          |
| 5%Co/CTF-1                                          | 0.05                             | 33.5  | 42.7           | This study |
| 3%Co/CTF-1                                          | 0.03                             | 42.3  | -              | This study |
| 5%Co/CNT                                            | 0.05                             | 8.5   | 46.9           | This study |
| 5%Co/AC                                             | 0.05                             | 5.8   | 47.2           | This study |
| 5%Ni/CTF-1                                          | 0.05                             | 8.75  | -              | This study |
| 5%Ni/CNT                                            | 0.05                             | 5.4   | -              | This study |
| 5%Ni/AC                                             | 0.05                             | 2.6   | -              | This study |
| Au@Co                                               | 0.02                             | 13.7  | -              | 8          |
| Co <sub>35</sub> Pd <sub>65</sub>                   | 0.024                            | 22.7  | 27.5           | 9          |
| Ag@CoNi/graphene                                    | 0.05                             | 15.89 | 36.15          | 10         |
| PEI-GO/Co                                           | 0.11                             | 39.9  | 28.2           | 11         |
| Ni <sub>2</sub> P                                   | 0.054                            | 40.4  | 44.6           | 12         |
| Ni@MCS-30                                           | 0.016                            | 30.7  | -              | 13         |
| Pt black                                            | 0.018                            | 14    | -              | 14         |
| 2 wt.% Pd/ $\gamma$ -Al <sub>2</sub> O <sub>3</sub> | 0.018                            | 1.3   | -              | 14         |

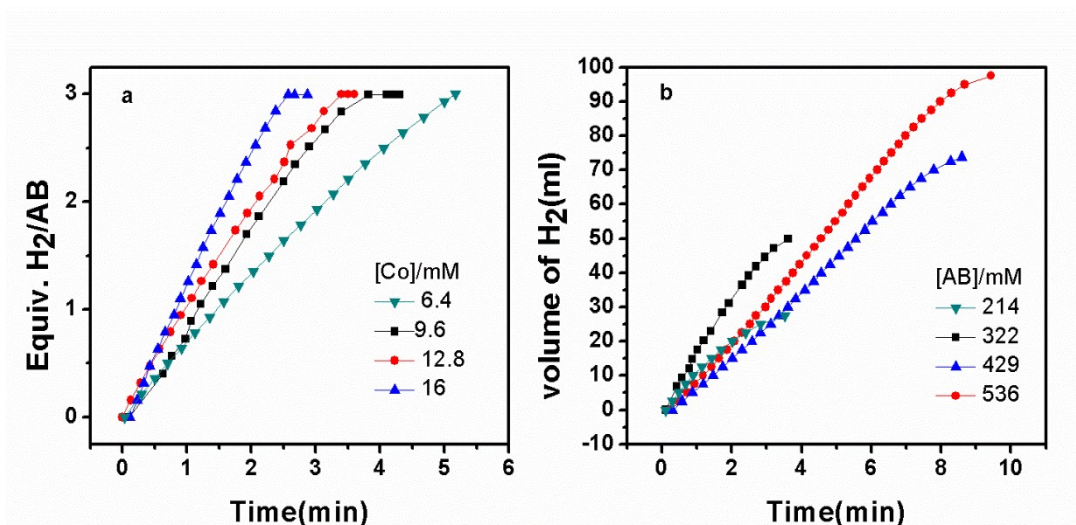

Figure S3. The Plots of volume of H<sub>2</sub> vs. time from AB hydrolysis catalyzed by the Co/CTF-1 catalyst at different catalyst (a) and AB concentrations (b) at T =298 K.

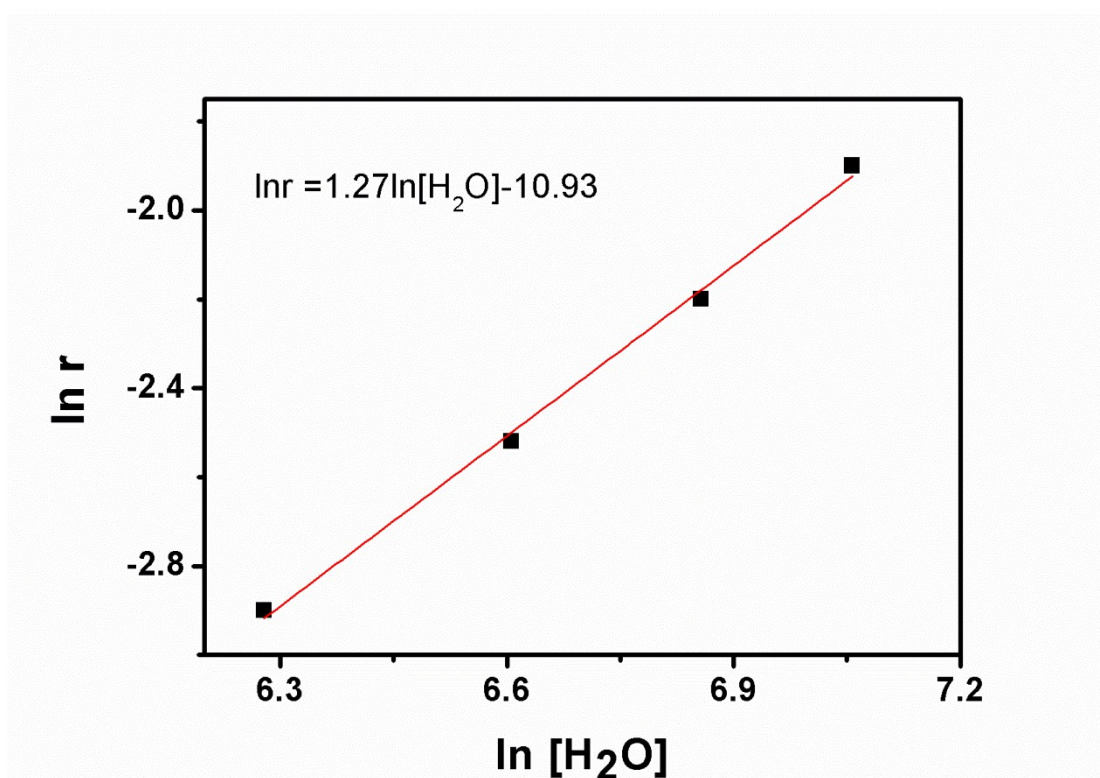

Figure S4. The plot of hydrogen generation rate versus the concentration of H<sub>2</sub>O in natural logarithmic scale,  $\ln(\text{rate}) = 1.27 \ln [H_2O] - 10.93$

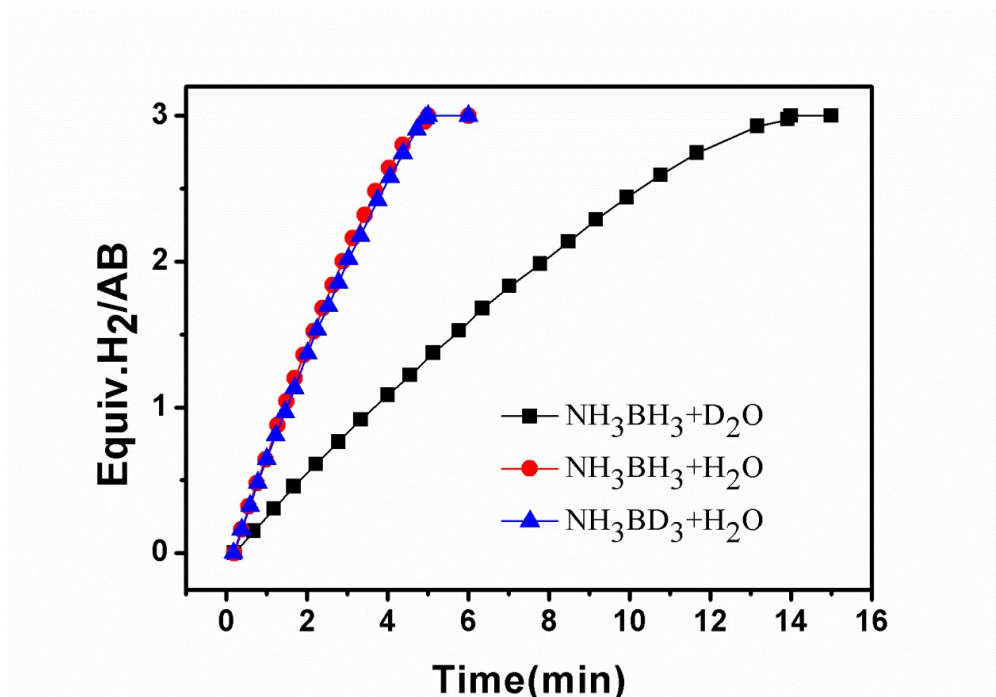

Figure S5. Kinetic isotope effect of hydrolytic AB catalyzed by 5%Co/CTF-1 at room temperature with  $n_{\text{Co}}:n_{\text{AB}}=0.05:1$  for  $\text{NH}_3\text{BH}_3$  in  $\text{D}_2\text{O}$  (black),  $\text{NH}_3\text{BD}_3$  in  $\text{H}_2\text{O}$  (blue) and  $\text{NH}_3\text{BH}_3$  in  $\text{H}_2\text{O}$  (red).

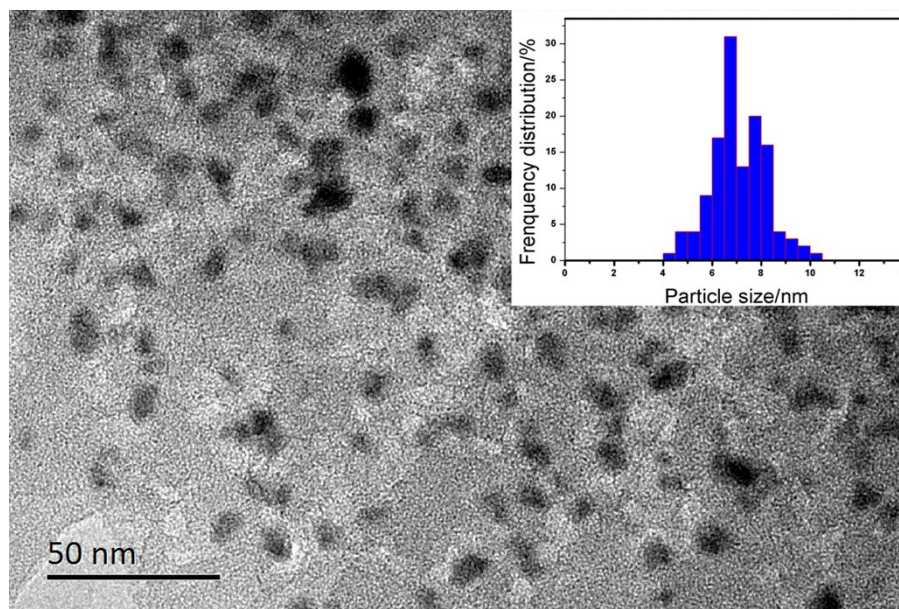

Figure S6. TEM image and corresponding size histograms of Co/CTF-1 NPs after 5 recycle times.

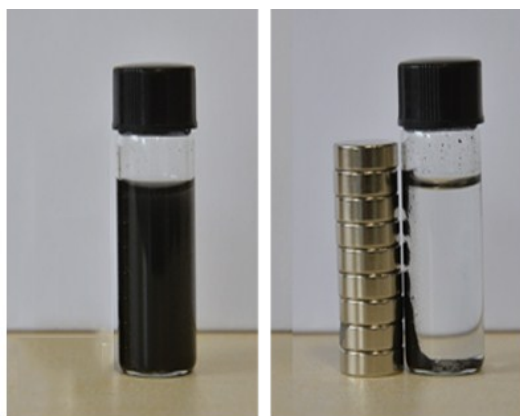

**Figure S7. Left. After hydrolysis reaction; Right. Separation of catalyst by magnet.**

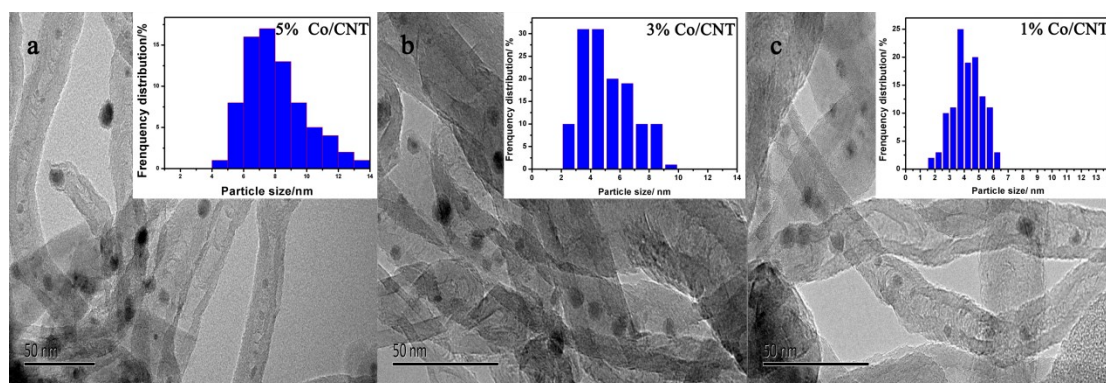

**Figure S8. TEM images and corresponding size histograms of a. 5%Co/CNT, b. 3%Co/CNT, c. 1%Co/CNT. The average size is calculated from at least 100 NPs.**

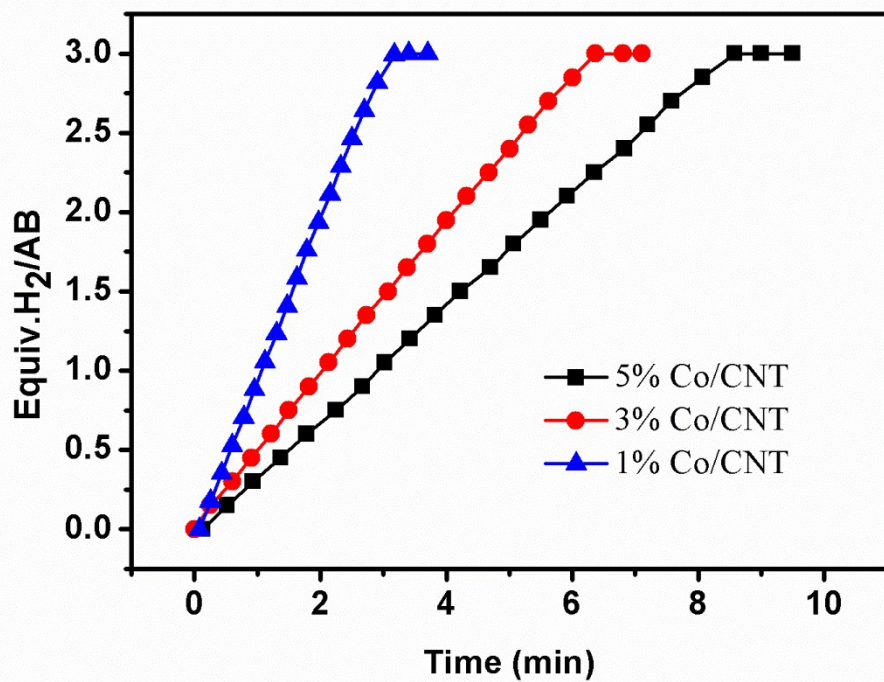

Figure S9. Plot of time vs volume of H<sub>2</sub> generated from AB hydrolysis catalyzed by 5%Co/CNT, 3%Co/CNT, 1%Co/CNT. ( [AB] = 322 mM, 5ml,  $n_{\text{metal}}/n_{\text{AB}}=0.05$ )



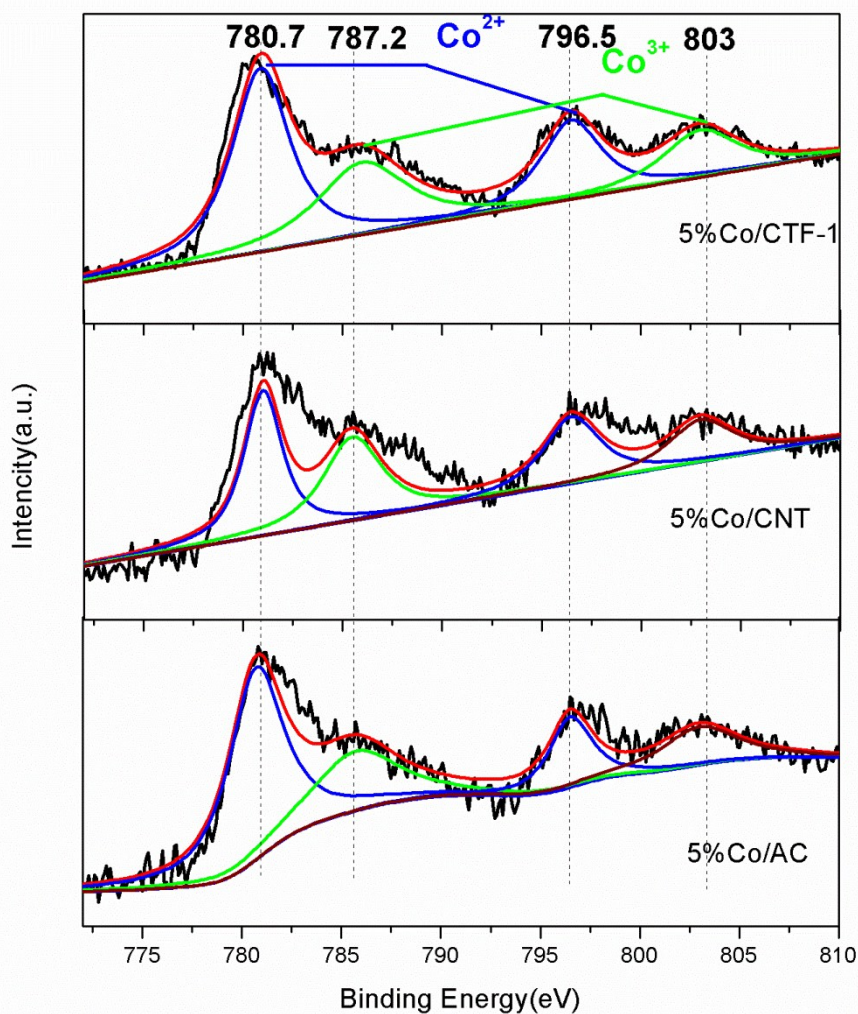

**Figure S10. XPS spectra of 5%Co/CTF, 5%Co/CNT, 5%Co/AC before Ar sputtering.**

**References:**

1. Q. Xu and M. Chandra, *J. Power Sources* 2006, **163**, 364-370.
2. M. Rakap and S. Özkar, *Int. J. Hydrogen Energy* 2010, **35**, 3341-3346.
3. O. Metin and S. Ozkar, *Energy Fuels*, 2009, **23**, 3517-3526.
4. Ö. Metin and S. Özkar, *Int. J. Hydrogen Energy* 2011, **36**, 1424-1432.
5. L. Yang, N. Cao, C. Du, H. Dai, K. Hu, W. Luo and G. Cheng, *Mater. Lett.* , 2014, **115**, 113-116.

6. K. Aranishi, Q. L. Zhu and Q. Xu, *ChemCatChem*, 2014, **6**, 1375-1379.
7. O. Metin, V. Mazumder, S. Ozkar and S. S. Sun, *J. Am. Chem. Soc.*, 2010, **132**, 1468.
8. J.-M. Yan, X.-B. Zhang, T. Akita, M. Haruta and Q. Xu, *J. Am. Chem. Soc.*, 2010, **132**, 5326-5327.
9. D. Sun, V. Mazumder, O. Metin and S. Sun, *ACS Nano*, 2011, **5**, 6458-6464.
10. L. Yang, J. Su, X. Meng, W. Luo and G. Cheng, *J. Mater. Chem. A*, 2013, **1**, 10016-10023.
11. J. Hu, Z. Chen, M. Li, X. Zhou and H. Lu, *ACS Appl. Mat. Interfaces* 2014, **6**, 13191-13200.
12. C. Y. Peng, L. Kang, S. Cao, Y. Chen, Z. S. Lin and W. F. Fu, *Angew. Chem. Int. Ed.*, 2015.
13. P.-Z. Li, A. Aijaz and Q. Xu, *Angew. Chem. Int. Ed.*, 2012, **51**, 6753-6756.
14. Q. Xu and M. Chandra, *J. Alloys Compd.*, 2007, **446-447**, 729-732.
